# Supplementary material for: Klinefelter syndrome has increased brain responses to auditory stimuli and motor output, but not to visual stimuli or Stroop adaptation
Source: PubMed Central journal article supplement — Neuroimage Clin. 2016 Feb 11;11:239–51. doi: 10.1016/j.nicl.2016.02.002 (PMC4773384; doi:10.1016/j.nicl.2016.02.002), 2016-02-11
Supplement: mmc1.pdf [file mmc1.pdf]

## Supplementary material

### Supplementary table

Supplementary table T1

Table S1. Participant movement during fMRI-scanning

| <b>Movement parameters</b> | <b>X-trans</b> | <b>Y-trans</b> | <b>Z-trans</b> | <b>X-rotate</b> | <b>Y-rotate</b> | <b>Z-rotate</b> |
|----------------------------|----------------|----------------|----------------|-----------------|-----------------|-----------------|
| <i>Mean range KS</i>       | 0.33 mm        | 0.55 mm        | 1.48 mm        | 0.23 °          | 0.01 °          | 0.01 °          |
| <i>Mean range Controls</i> | 0.33 mm        | 0.47 mm        | 1.34 mm        | 0.021°          | 0.01 °          | 0.01 °          |
| <i>t(96) difference</i>    | 0.14           | -1.45          | -0.74          | -0.47           | -0.13           | -0.05           |
| <i>p(uncorrected)</i>      | 0.89           | 0.15           | 0.46           | 0.64            | 0.9             | 0.96            |

## Supplementary figures

### Supplementary figure S1

FIGURE S1: 2nd level design matrix

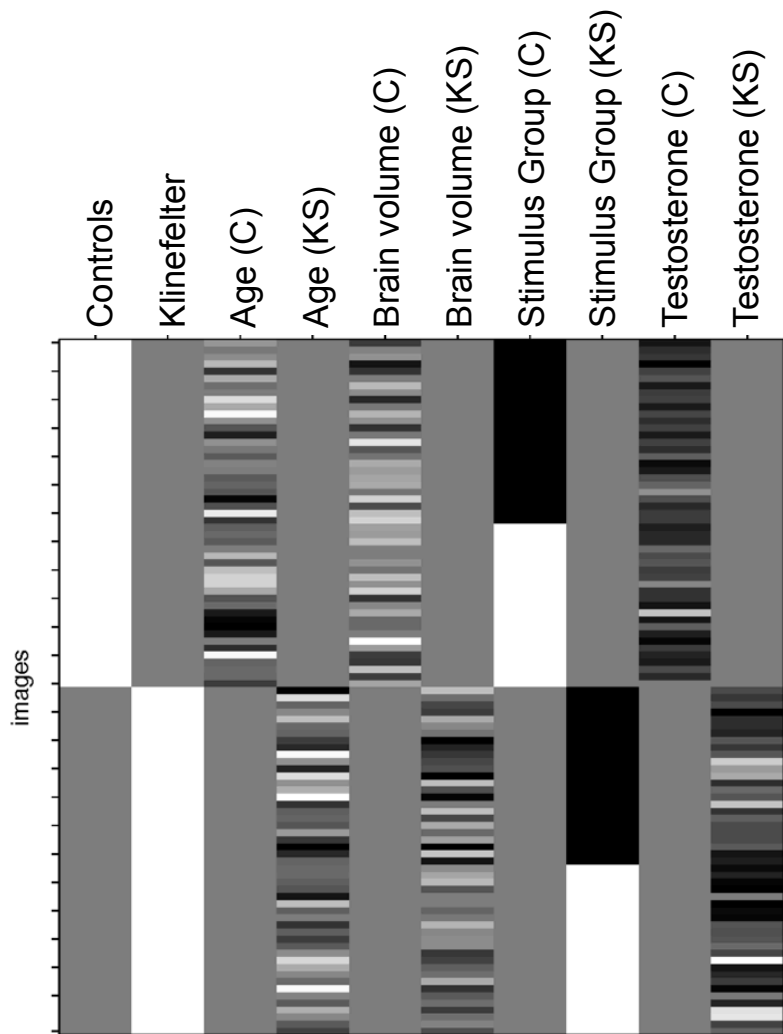

Supplementary figure S2

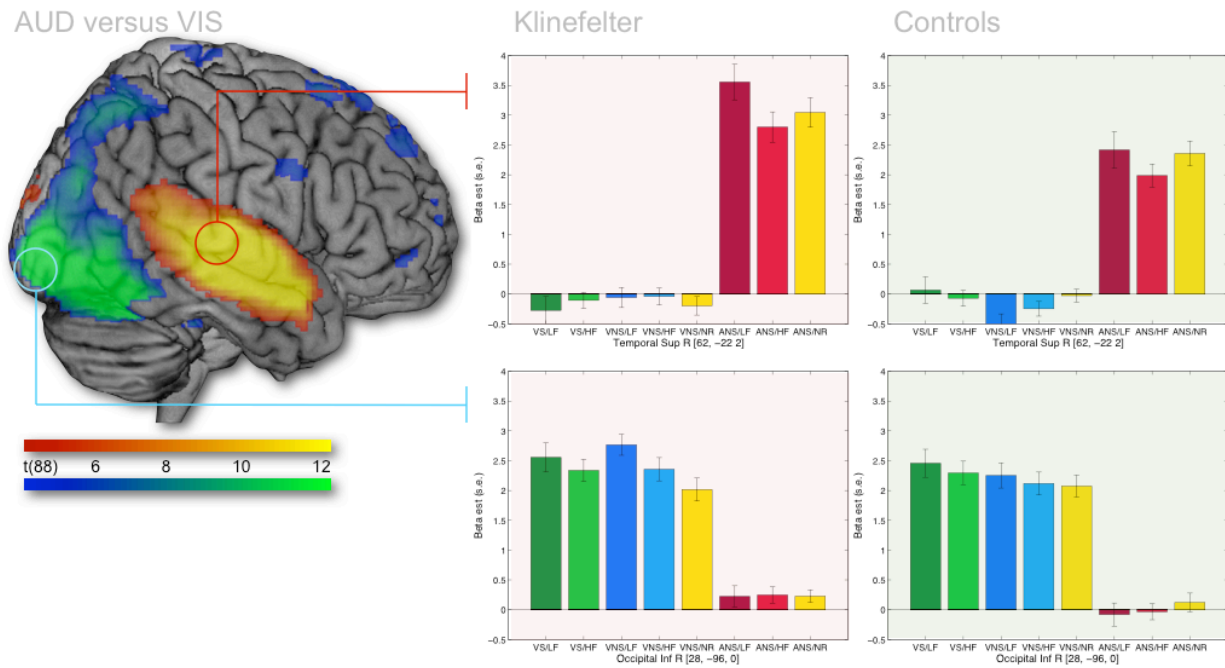

FIGURE S2: Differences in primary perceptual cortices in the right hemisphere. Similar to the left increased activation is seen for KS in auditory cortex during auditory stimuli (top row) but not in visual cortex for visual stimuli (bottom row).

Supplementary figure S3

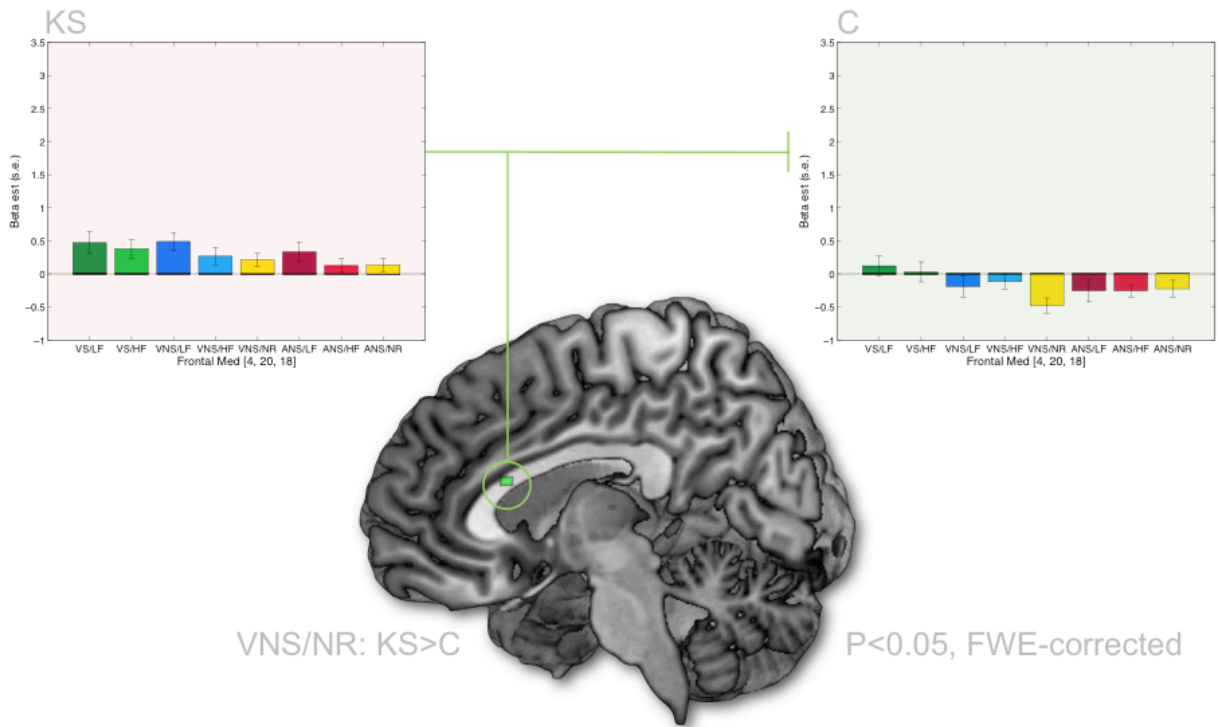

FIGURE S3: Significant difference between KS and C for the Visual stimulus without a response. The effect is found outside grey matter and is interpreted to be a false positive.
